# Supplementary material for: Linking consumer physiological status to food-web structure and prey food value in the Baltic Sea
Source: Springer Nature journal article supplement (doi:10.1007/s13280-019-01201-1), 2019-06-05
Supplement: MOESM1 [file 13280_2019_1201_MOESM1_ESM.pdf]

*Ambio*

Electronic Supplementary Material

*This supplementary material has not been peer-reviewed*

**Title: Linking consumer physiological status to food-web structure and prey food value in the Baltic Sea**

Authors: Agnes M. L. Karlson, Elena Gorokhova, Anna Gårdmark, Zeynep Pekcan-Hekim, Michele Casini, Jan Albertsson, Brita Sundelin, Olle Karlsson, Lena Bergström

**Supplementary table S1.** Abundance, biomass or freq. of occurrence and metrics for physiological status or population/community trait (representing food value of prey to consumers) of studied species/food web components in the Baltic Sea. All data are for years 1993-2014. Abbreviations: SMNH – Swedish Museum of Natural History, IVL – Swedish Environmental Research Institute, SLU- Swedish University of Agricultural Research (Dept. Aquatic resources), SD – ICES (International Council for Exploration of the Sea) subdivisions (Fig. 1). Amphipods: *Monoporeia* and *Pontoporeia*, Polychaetes: *Marenzelleria* and *Bylgides*. See Fig 1 for location of sampling stations; details can be found in text and in supplementary Table S2.

| Food web component        | Status metric                  | Status metric classification | Sampling status metric        | Sampling Abundance / Biomass /Frequency of occurrence | Sampling Location (status metric and abund./biomass/Freq.) | Data holder            |
|---------------------------|--------------------------------|------------------------------|-------------------------------|-------------------------------------------------------|------------------------------------------------------------|------------------------|
| Grey seal                 | Blubber thickness (BT)         | Physiological                | Aug-Dec                       | May                                                   | pan-Baltic                                                 | SMNH                   |
| Cod                       | Condition (c)                  | Physiological                | Oct                           | Oct                                                   | BP: SD 25-28<br>BoS; -                                     | ICES, SLU              |
|                           | Fat content                    | Physiological                | Oct-Nov                       | Oct-Nov                                               | South eastern Gotland                                      | SMNH                   |
| Herring                   | Weight at age (WAA)            | Physiological                | all year                      | all year                                              | BP: SD 25-29, 32<br>BoS: SD 30                             | ICES                   |
|                           | Fat content                    | Physiological                | BP: Oct<br>BoS: May & October | Oct-Nov                                               | BP: Landsort<br>BoS: Ängskärskubb                          | SMNH                   |
|                           | Condition (c)                  | Physiological                | Oct-Nov                       | Oct-Nov                                               | BP; SD 28<br>BoS: SD 30                                    | ICES, SLU              |
| Sprat                     | Weight at age (WAA)            | Physiological                | all year                      | all year                                              | pan-Baltic: SD 22-32                                       | ICES                   |
|                           | Condition (c)                  | Physiological                | Oct-Nov                       | Oct-Nov                                               | Pan-Baltic: SD 28                                          | ICES, SLU              |
| <i>Saduria entomon</i>    | Mean body weight (mw)          | Population trait             | May                           | May (Askö)<br>Aug (Outer)                             | BP: Askö (21 stns), outer (5 stns), BoS: 13 stns           | SMHI / SYKE (Table S1) |
| <i>Monoporeia affinis</i> | Viable embryos per female (ve) | Physiological                | Jan                           | May (see amphipods)                                   | BP: 5 stns<br>BoS: 5 stns                                  | IVL                    |
| Amphipods & polychaetes   | NA                             | NA                           | NA                            | May                                                   | BP: 21 stns<br>BoS: 13 stns                                | SMHI                   |
| Zooplankton               | Mean size (ms)                 | Community trait              | June-Sept                     | June-Sept                                             | BP: Askö and Landsort<br>BoS: 5 stations                   | SMHI /SYKE (Table S1)  |

**Table S2.** Information on sampling stations used for benthos (B) and zooplankton (Z). NBP and WGP denote Northern Baltic Proper and Western Gotland Basin.

| Station | Zoopl/Benthos | Country | Assessment unit | Latitude     | Longitude    | depth | Sampling time           | Data originator               |
|---------|---------------|---------|-----------------|--------------|--------------|-------|-------------------------|-------------------------------|
| SR5     | Z/B           | Finland | Bothnian Sea    | N 61°05.00'  | E 19°34.78'  | 130   | Single sampling, August | Finnish Environment Institute |
| US5     | Z/B           | Finland | Bothnian Sea    | N 62°35.17'  | E 19°58.13'  | 137   | Single sampling, August | Finnish Environment Institute |
| C14     | Z             | Sweden  | Bothnian Sea    | N 62°05.29'  | E 18°32.95'  | 85    | June-Sep; 3-4 occasions | Umeå University               |
| C3      | Z             | Sweden  | Bothnian Sea    | N 62°39.17'  | E 18°57.18'  | 195   | June-Sep; 3-4 occasions | Umeå University               |
| F64     | Z             | Finland | Åland Sea       | N 60°11.34'  | E 19°08.55'  | 286   | Single sampling, August | Finnish Environment Institute |
| B1      | Z             | Sweden  | NBP/WGB         | N 58°48.19'  | E 17° 37' 53 | 40    | June-Sep; 8 occasions   | Stockholm University          |
| BY31    | Z             | Sweden  | NBP/WGB         | N 58°35.00'  | E 18° 14' 00 | 459   | June-Sep; 8 occasions   | Stockholm University          |
| LL23    | Z             | Finland | NBP/WGB         | N 58°35.00'  | E 18° 14' 00 | 459   | Single sampling, August | Finnish Environment Institute |
| F69     | B             | Finland | NBP             | N 59°46.95'  | E 19°55.95'  | 193   | Single sampling, August | Finnish Environment Institute |
| LL12    | B             | Finland | NBP             | N 59°28.95'  | E 22°.5395   | 83    | Single sampling, August | Finnish Environment Institute |
| IBSV9   | B             | Finland | NBP             | N 58°25.95'  | E 20°.57     | 88    | Single sampling, August | Finnish Environment Institute |
| IBSV10  | B             | Finland | NBP             | N 58°20.95'  | E 21°.151    | 79    | Single sampling, August | Finnish Environment Institute |
| LF1     | B             | Finland | NBP             | N 57°58.95'  | E 21°.1696   | 68    | Single sampling, August | Finnish Environment Institute |
| 6001    | B             | Sweden  | NBP/WGB         | N 58° 49.58' | E 17° 34.58  | 39.5  | Single sampling, May    | Stockholm University          |
| 6004    | B             | Sweden  | NBP/WGB         | N 58° 46.44  | E 17° 41.48  | 44    | Single sampling, May    | Stockholm University          |

|      |   |        |         |             |             |      |                         |                      |
|------|---|--------|---------|-------------|-------------|------|-------------------------|----------------------|
| 6006 | B | Sweden | NBP/WGB | N 58° 43.13 | E 17° 50.54 | 60   | Single sampling,<br>May | Stockholm University |
| 6009 | B | Sweden | NBP/WGB | N 58° 45.07 | E 17° 36.04 | 17.5 | Single sampling,<br>May | Stockholm University |
| 6010 | B | Sweden | NBP/WGB | N 58° 50.45 | E 17° 33.11 | 21   | Single sampling,<br>May | Stockholm University |
| 6011 | B | Sweden | NBP/WGB | N 58° 43.99 | E 17° 37.17 | 27.5 | Single sampling,<br>May | Stockholm University |
| 6012 | B | Sweden | NBP/WGB | N 58° 47.00 | E 17° 34.40 | 22   | Single sampling,<br>May | Stockholm University |
| 6013 | B | Sweden | NBP/WGB | N 58° 46.21 | E 17° 35.70 | 9    | Single sampling,<br>May | Stockholm University |
| 6014 | B | Sweden | NBP/WGB | N 58° 48.17 | E 17° 34.71 | 11   | Single sampling,<br>May | Stockholm University |
| 6015 | B | Sweden | NBP/WGB | N 58° 46.00 | E 17° 39.40 | 21.5 | Single sampling,<br>May | Stockholm University |
| 6016 | B | Sweden | NBP/WGB | N 58° 44.68 | E 17° 50.20 | 27   | Single sampling,<br>May | Stockholm University |
| 6017 | B | Sweden | NBP/WGB | N 58° 46.13 | E 17° 45.15 | 27   | Single sampling,<br>May | Stockholm University |
| 6018 | B | Sweden | NBP/WGB | N 58° 47.83 | E 17° 40.22 | 21.5 | Single sampling,<br>May | Stockholm University |
| 6019 | B | Sweden | NBP/WGB | N 58° 44.29 | E 17° 41.00 | 40.5 | Single sampling,<br>May | Stockholm University |
| 6020 | B | Sweden | NBP/WGB | N 58° 48.66 | E 17° 36.41 | 37   | Single sampling,<br>May | Stockholm University |
| 6021 | B | Sweden | NBP/WGB | N 58° 46.01 | E 17° 49.88 | 52.5 | Single sampling,<br>May | Stockholm University |
| 6022 | B | Sweden | NBP/WGB | N 58° 44.64 | E 17° 48.84 | 47   | Single sampling,<br>May | Stockholm University |
| 6024 | B | Sweden | NBP/WGB | N 58° 47.40 | E 17° 45.50 | 33   | Single sampling,<br>May | Stockholm University |
| 6023 | B | Sweden | NBP/WGB | N 58° 45.52 | E 17° 43.13 | 36   | Single sampling,<br>May | Stockholm University |

|      |   |        |              |             |             |      |                         |                      |
|------|---|--------|--------------|-------------|-------------|------|-------------------------|----------------------|
| 6025 | B | Sweden | NBP/WGB      | N 58° 47.42 | E 17° 43.70 | 37.5 | Single sampling,<br>May | Stockholm University |
| N 15 | B | Sweden | Bothnian Sea | N 63° 26.25 | E 20° 03.00 | 44.8 | Single sampling,<br>May | Umeå University      |
| N 16 | B | Sweden | Bothnian Sea | N 63° 24.81 | E 19° 51.02 | 49   | Single sampling,<br>May | Umeå University      |
| N 17 | B | Sweden | Bothnian Sea | N 63° 23.99 | E 19° 58.63 | 52   | Single sampling,<br>May | Umeå University      |
| N 18 | B | Sweden | Bothnian Sea | N 63° 22.82 | E 19° 44.29 | 54   | Single sampling,<br>May | Umeå University      |
| N 19 | B | Sweden | Bothnian Sea | N 63° 21.80 | E 19° 44.61 | 58   | Single sampling,<br>May | Umeå University      |
| N 20 | B | Sweden | Bothnian Sea | N 63° 22.38 | E 20° 00.73 | 59.4 | Single sampling,<br>May | Umeå University      |
| N 21 | B | Sweden | Bothnian Sea | N 63° 21.79 | E 19° 57.06 | 61.2 | Single sampling,<br>May | Umeå University      |
| N 22 | B | Sweden | Bothnian Sea | N 63° 23.35 | E 19° 51.44 | 63.5 | Single sampling,<br>May | Umeå University      |
| N 23 | B | Sweden | Bothnian Sea | N 63° 20.44 | E 19° 40.49 | 82   | Single sampling,<br>May | Umeå University      |
| N 24 | B | Sweden | Bothnian Sea | N 63° 25.01 | E 20° 06.74 | 88.5 | Single sampling,<br>May | Umeå University      |
| N 25 | B | Sweden | Bothnian Sea | N 63° 18.75 | E 19° 48.03 | 126  | Single sampling,<br>May | Umeå University      |

**Supplementary Table S3.** Detailed results from Kendall-tau tests on status metrics and abundance data from each species/food web component in the respective basin (Bothnian Sea, BoS, or Baltic proper, BP). See figures 3 and 4.

|                             | <b>BoS</b>             | <b>BP</b>              |
|-----------------------------|------------------------|------------------------|
| <b><i>Status metric</i></b> |                        |                        |
| seal BT                     | K-t: -0.34, p=0.030    |                        |
| cod c                       | na                     | K-t: -0.89,<br>p<0.001 |
| cod fat                     | na                     | K-t: -0.49,<br>p=0.002 |
| herring WAA                 | K-t: -0.34,<br>p=0.030 | K-t: 0.12,<br>p=0.446  |
| herring c                   | K-t: -0.20,<br>p=0.215 | K-t: 0.43,<br>p=0.006  |
| herring fat                 | K-t: 0.07,<br>p=0.693  | K-t: 0.33,<br>p=0.032  |
| sprat WAA                   | na                     | K-t: -0.01,<br>p=0.933 |
| sprat c                     | na                     | K-t: 0.43,<br>p=0.006  |
| <i>Saduria</i> mw           | K-t: -0.62,<br>p<0.001 | K-t: -0.29,<br>p=0.063 |
| <i>Monoporeia</i> ve        | K-t:0.36,<br>p=0.021   | K-t: -0.02,<br>p=0.922 |
| zooplankton ms              | K-t:- 0.07,<br>p=0.693 | K-t: 0.08,<br>p=0.612  |
|                             |                        |                        |
| <b><i>Abundance</i></b>     |                        |                        |
| seal abund                  | K-t: 0.97, p=0         |                        |
| cod abund                   | na                     | K-t: 0.20,<br>p=0.215  |
| herring abund               | K-t: 0.65,<br>p<0.001  | K-t: 0.26,<br>p=0.091  |
| sprat abund                 | na                     | K-t: -0.46,<br>p=0.003 |
| <i>Saduria</i> freq (Askö)  | na                     | K-t: 0.37,<br>p=0.024  |
| <i>Saduria</i> freq         | K-t: -0.48,<br>p=0.004 | K-t: -0.44,<br>p=0.009 |
| Amphipods abund             | K-t: -0.43,<br>p=0.006 | K-t: 0.26,<br>p=0.102  |
| AmpPol abund                | K-t: -0.28,<br>p=0.071 | K-t: 0.48,<br>p=0.002  |
| zooplankton biomass         | K-t: -0.29,<br>p=0.063 | K-t: -0.11,<br>p=0.499 |

**Supplementary Table S4.** Predictors in the two best linear models for each response variable (predictors from PLSR results for comparisons, see table 2 and 3 for details). Linear models were tested using a normal error structure and selected based on Akaike information criteria (AIC) estimates and principle of parsimony (within 2 units from lowest AIC). Predictors are listed in order of importance and in bold when there are differences between methods. Analyses were performed in Statistica (Statsoft) using the GLZ module. Goodness of fit and residuals were examined to confirm that the selected error distribution and link function were appropriate.

| <b>Response variable</b> | <b>Predictors in PLSR</b>                                         | <b>Predictors in Linear models</b>                                                                                                             | <b>AIC</b> |
|--------------------------|-------------------------------------------------------------------|------------------------------------------------------------------------------------------------------------------------------------------------|------------|
| BoS Saduria mw           | Amphipods, Freq. Saduria                                          | Amphipods, Freq. Saduria                                                                                                                       | 51.94      |
|                          |                                                                   | Amphipods                                                                                                                                      | 53.39      |
| BP Saduria mw            | AmpPol, Freq. Saduria coast                                       | AmpPol, Freq. Saduria coast, Freq. Saduria open sea                                                                                            | 58.25      |
|                          |                                                                   | AmpPol, Freq Saduria open sea                                                                                                                  | 59.89      |
| BP Sprat WAA             | Lag Sprat WAA, <b>zoopl biomass</b> , cod, <b>herring</b> , sprat | Lag sprat WAA, sprat                                                                                                                           | 34.69      |
|                          |                                                                   | Lag sprat WAA, sprat, cod                                                                                                                      | 36.00      |
| BP Sprat c               | Sprat, zooplankton ms, <b>grey seal</b>                           | <b>Herring</b> , sprat                                                                                                                         | 33.79      |
|                          |                                                                   | <b>Herring</b> , sprat, zooplankton ms                                                                                                         | 33.99      |
| BoS Herring fat          | Amphipods, zooplankton ms                                         | Zooplankton ms, grey seal, <b>Herring</b>                                                                                                      | 45.96      |
|                          |                                                                   | Zooplankton ms, Amphipods                                                                                                                      | 46.12      |
| BoS Herring WAA          | Amphipods, <b>zooplankton ms</b> , grey seal                      | Amphipods                                                                                                                                      | 53.52      |
|                          |                                                                   | Amphipods, <b>herring</b> , grey seal                                                                                                          | 54.11      |
| BoS herring c            | Amphipods, <b>zooplankton ms</b>                                  | Amphipods, grey seal                                                                                                                           | 51.58      |
|                          |                                                                   | Amphipods, <b>herring</b>                                                                                                                      | 52.23      |
| BP herring fat           | Sprat, grey seal, zooplankton <b>ms</b>                           | <b>Freq. Saduria</b> , grey seal, sprat, <b>herring</b> , zooplankton <b>biomass</b>                                                           | 51.08      |
|                          |                                                                   | Sprat                                                                                                                                          | 52.10      |
| BP Herring WAA           | Lag herring WAA, sprat                                            | Lag herring WAA, <b>AmpPol</b> , sprat, <b>herring</b>                                                                                         | 27.17      |
|                          |                                                                   | Lag herring WAA, zooplankton biomass, AmpPol, sprat, herring                                                                                   | 28.98      |
| BP herring c             | Sprat, grey seal                                                  | Grey seal, <b>cod</b> , sprat, <b>herring</b>                                                                                                  | 36.37      |
|                          |                                                                   | Sprat, grey seal, <b>herring</b>                                                                                                               | 37.31      |
| Cod fat                  | Cod, <b>grey seal</b>                                             | <b>Herring WAA</b> , sprat, sprat WAA cod, <b>Freq Saduria open</b>                                                                            | 51.58      |
|                          |                                                                   | <b>Herring WAA</b> , sprat WAA, cod, <b>Freq Saduria open</b>                                                                                  | 52.10      |
| Cod c                    | Grey seal, <b>Freq. Saduria open</b>                              | <b>Herring</b> , <b>Herring WAA</b> , grey seal                                                                                                | 26.03      |
|                          |                                                                   | <b>Herring</b> , grey seal                                                                                                                     | 26.73      |
| Grey seal BT             | BOS Herring WAA, cod <b>c</b> , grey seal                         | BOS herring <b>c</b> , BOS herring WAA, BOS herring <b>fat</b> , sprat WAA, cod <b>fat</b> , sprat, <b>cod</b> , grey seal, <b>herring BOS</b> | 46.12      |
|                          |                                                                   | BOS herring <b>c</b> , BOS herring WAA, BOS herring <b>fat</b> , sprat WAA, cod <b>fat</b> , sprat, <b>cod</b> , grey seal                     | 47.41      |

a) Abundances

b) Physiological status/Food value

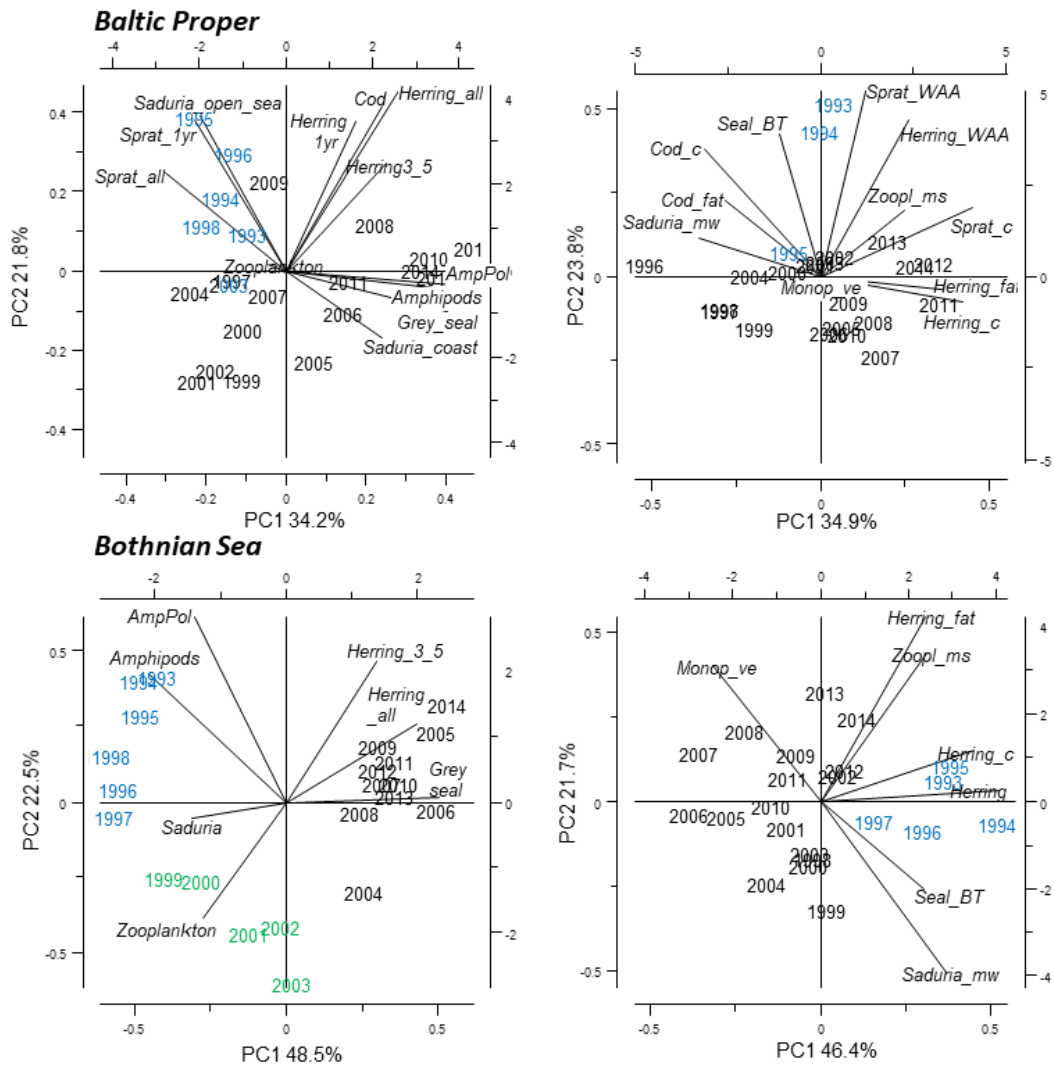

**Figure S1.** PCA biplots showing sample (year) scores and vectors for the assessed metrics. Abundance metrics (a) are shown at the left side of the panel and metrics representing physiological status or population/community traits (“food value”) (b) on the right side, separately for the Baltic proper (upper part of panel) and Bothnian Sea (lower part). Similarities and sudden shifts between adjacent years were assessed by chronological clustering. Similar colors for the years indicate higher similarity, while years with different colours are separated ( $p < 0.01$ ) based on euclidean distances. In both sub-basins, these analyses show a shift between the earlier years studied (until years between 1996 and 1998 for the different plots) for both physiological status/food value and abundances, reflecting changes in the relative abundance of taxa from different trophic levels and a decreasing physiological status/food value. Physiological status metrics are abbreviated as c (condition, see equation 1), WAA (weight at age) and ve (viable embryos, *Monoporeia affinis*). Population and community traits, respectively, are mw (mean weight, *Saduria entomon*), ms (mean size, zooplankton). For abundance data of herring and sprat, data are shown for their respective different year classes used in analyses (compare Table 3, e.g. 1 and 3-5 year olds, as well as the summed abundance of all year classes).
